# Supplementary material for: Scalp and Cranium Radiation Therapy Using Modulation (SCRUM) and Bolus
Source: PubMed Central journal article supplement — Adv Radiat Oncol. 2020 Apr 25;5(5):936–42. doi: 10.1016/j.adro.2020.03.017 (PMC7557138; doi:10.1016/j.adro.2020.03.017), 2020-04-25
Supplement: mmc3.pdf [file mmc3.pdf]

Print on 11" x 17"  
Tabloid Paper  
Child 51cm  
Head Circumference

Vertex

This Side is Touching  
Patient's Skin

Patient's R

Occipital

Patient's L

Neck Line
