# Supplementary material for: Scalp and Cranium Radiation Therapy Using Modulation (SCRUM) and Bolus
Source: PubMed Central journal article supplement — Adv Radiat Oncol. 2020 Apr 25;5(5):936–42. doi: 10.1016/j.adro.2020.03.017 (PMC7557138; doi:10.1016/j.adro.2020.03.017), 2020-04-25

Print on 8.5" x 11"  
Tabloid Paper  
Child 51cm  
Head Circumference

# Forehead

Side not touching skin

*Cut here as needed*

Patient's R

Patient's L

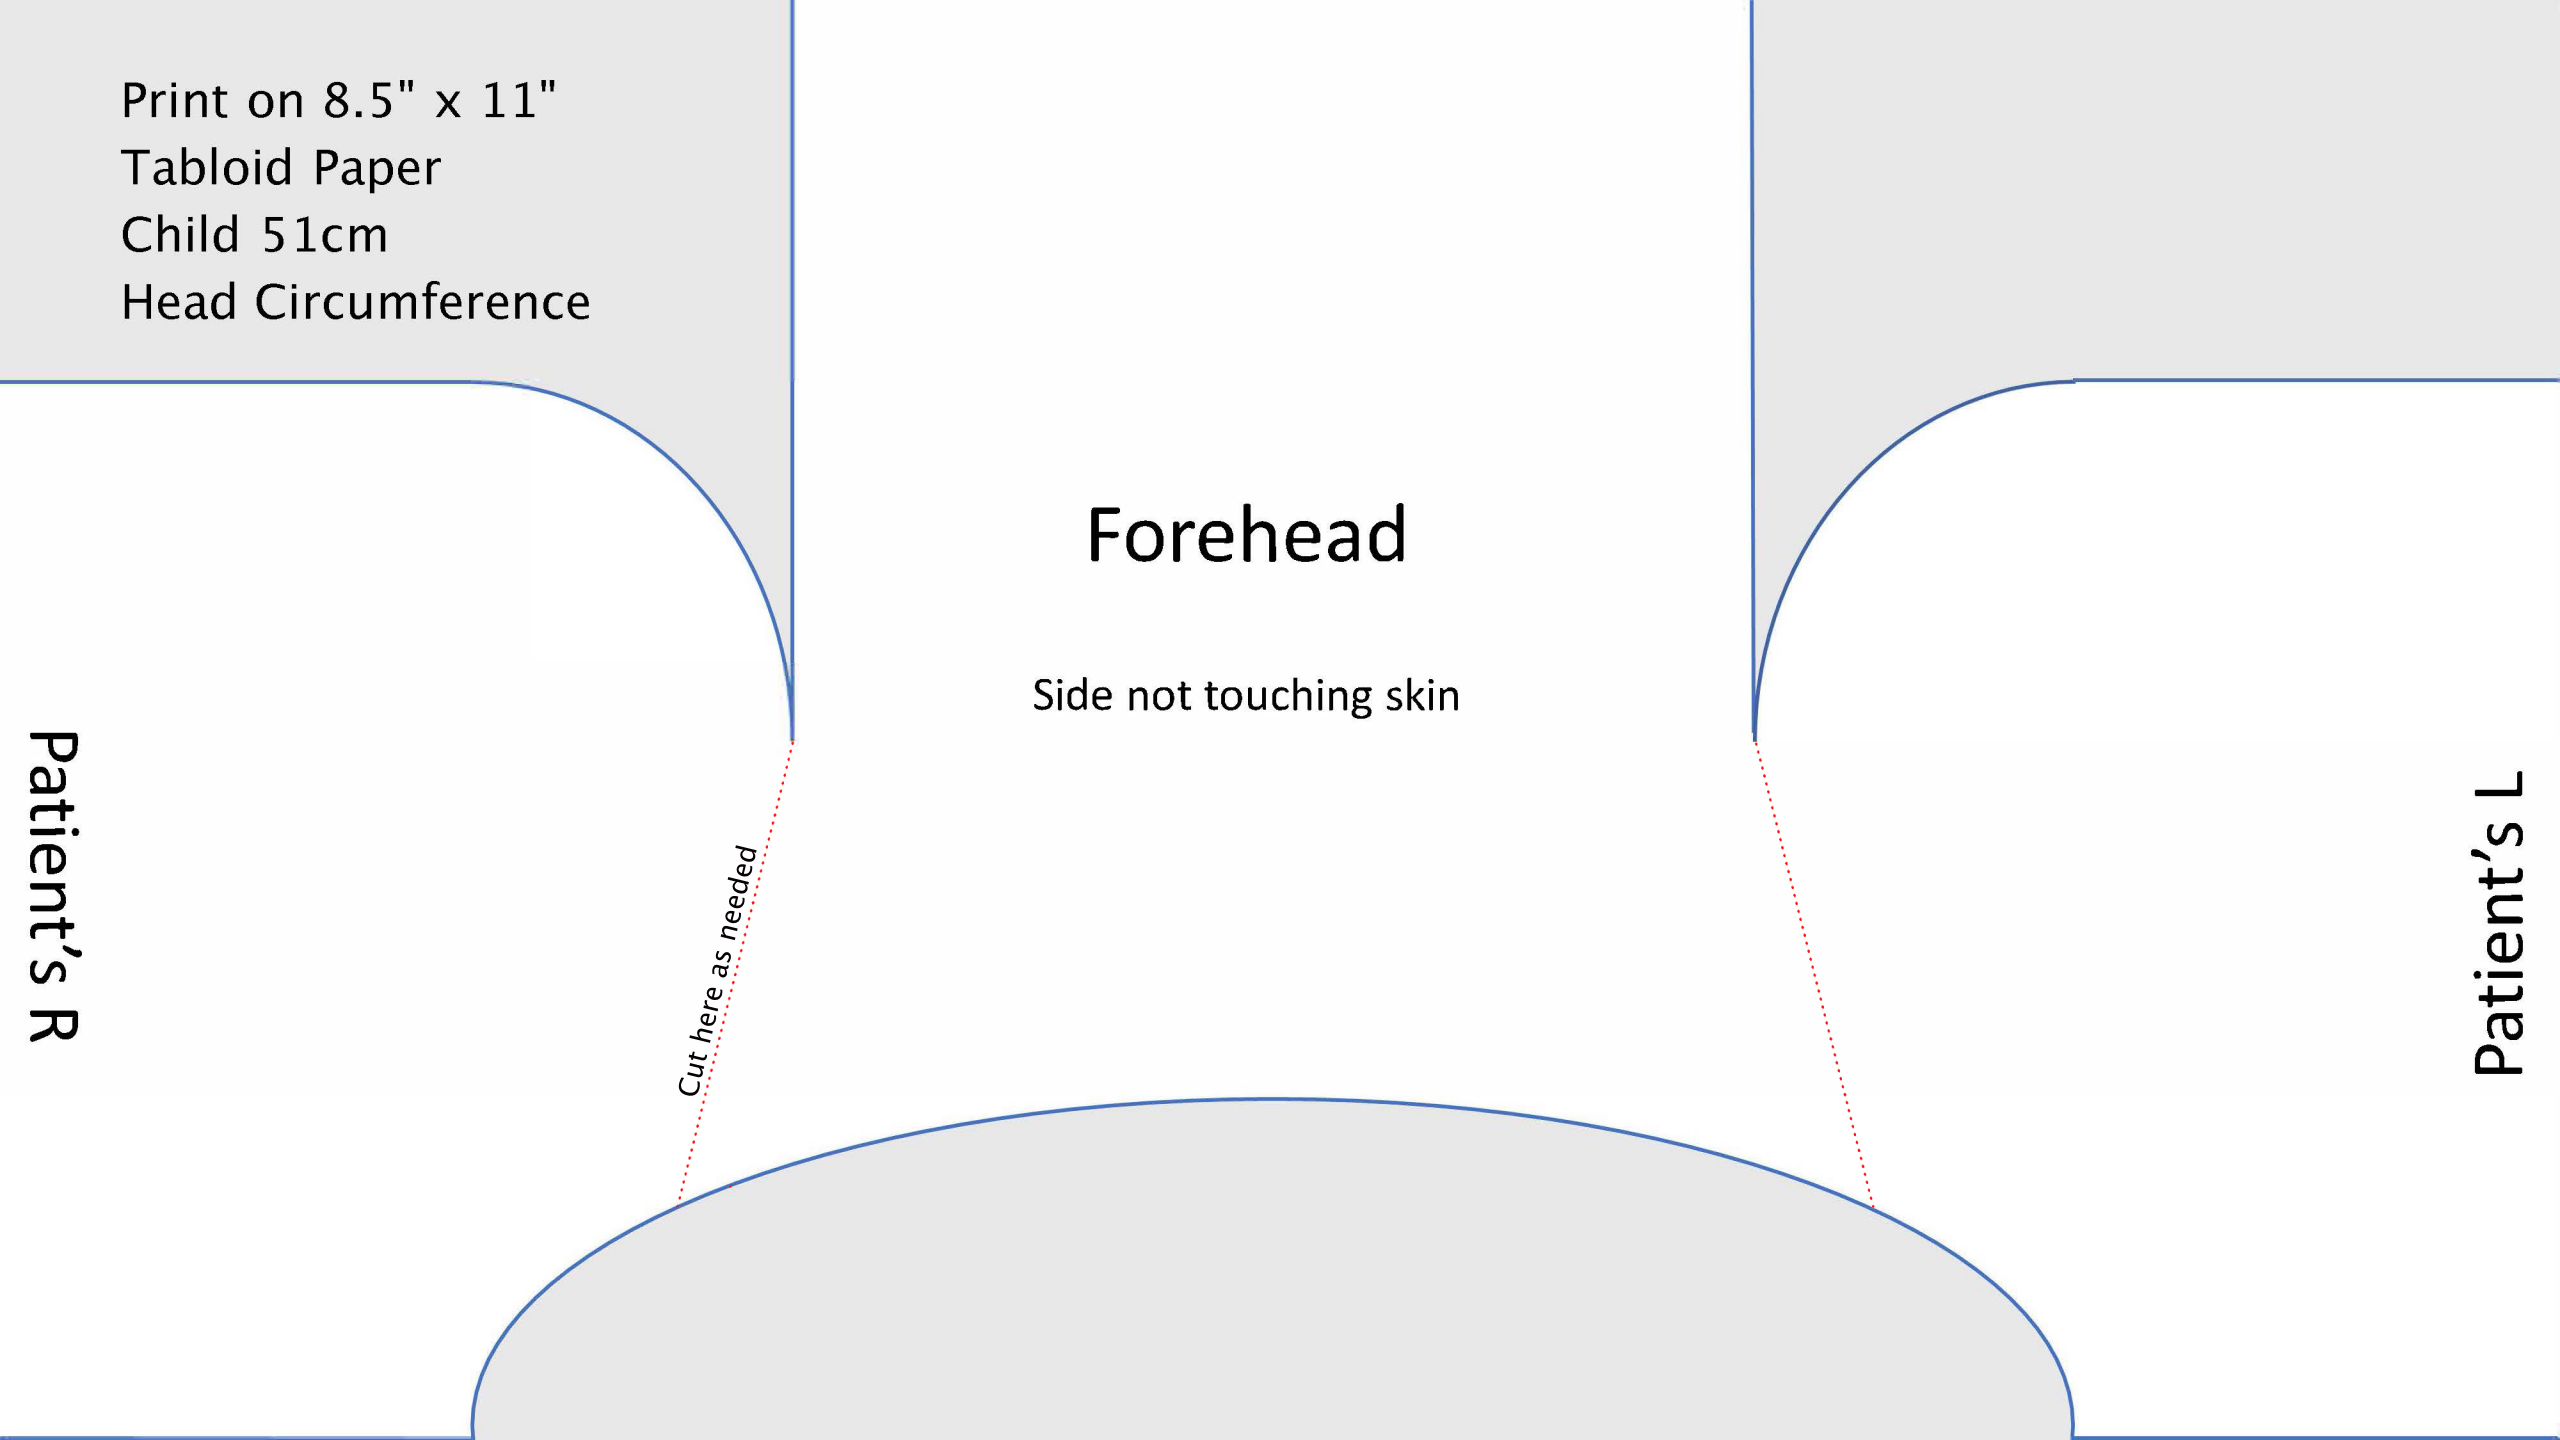

Supplement: mmc4.pdf [file mmc4.pdf]
