# Supplementary material for: Scalp and Cranium Radiation Therapy Using Modulation (SCRUM) and Bolus
Source: PubMed Central journal article supplement — Adv Radiat Oncol. 2020 Apr 25;5(5):936–42. doi: 10.1016/j.adro.2020.03.017 (PMC7557138; doi:10.1016/j.adro.2020.03.017), 2020-04-25

Print on 11" x 17"  
Tabloid Paper  
Adult 57cm  
Head Circumference

Forehead

Side not touching skin

*Cut here as needed*

Patient's R

Patient's L

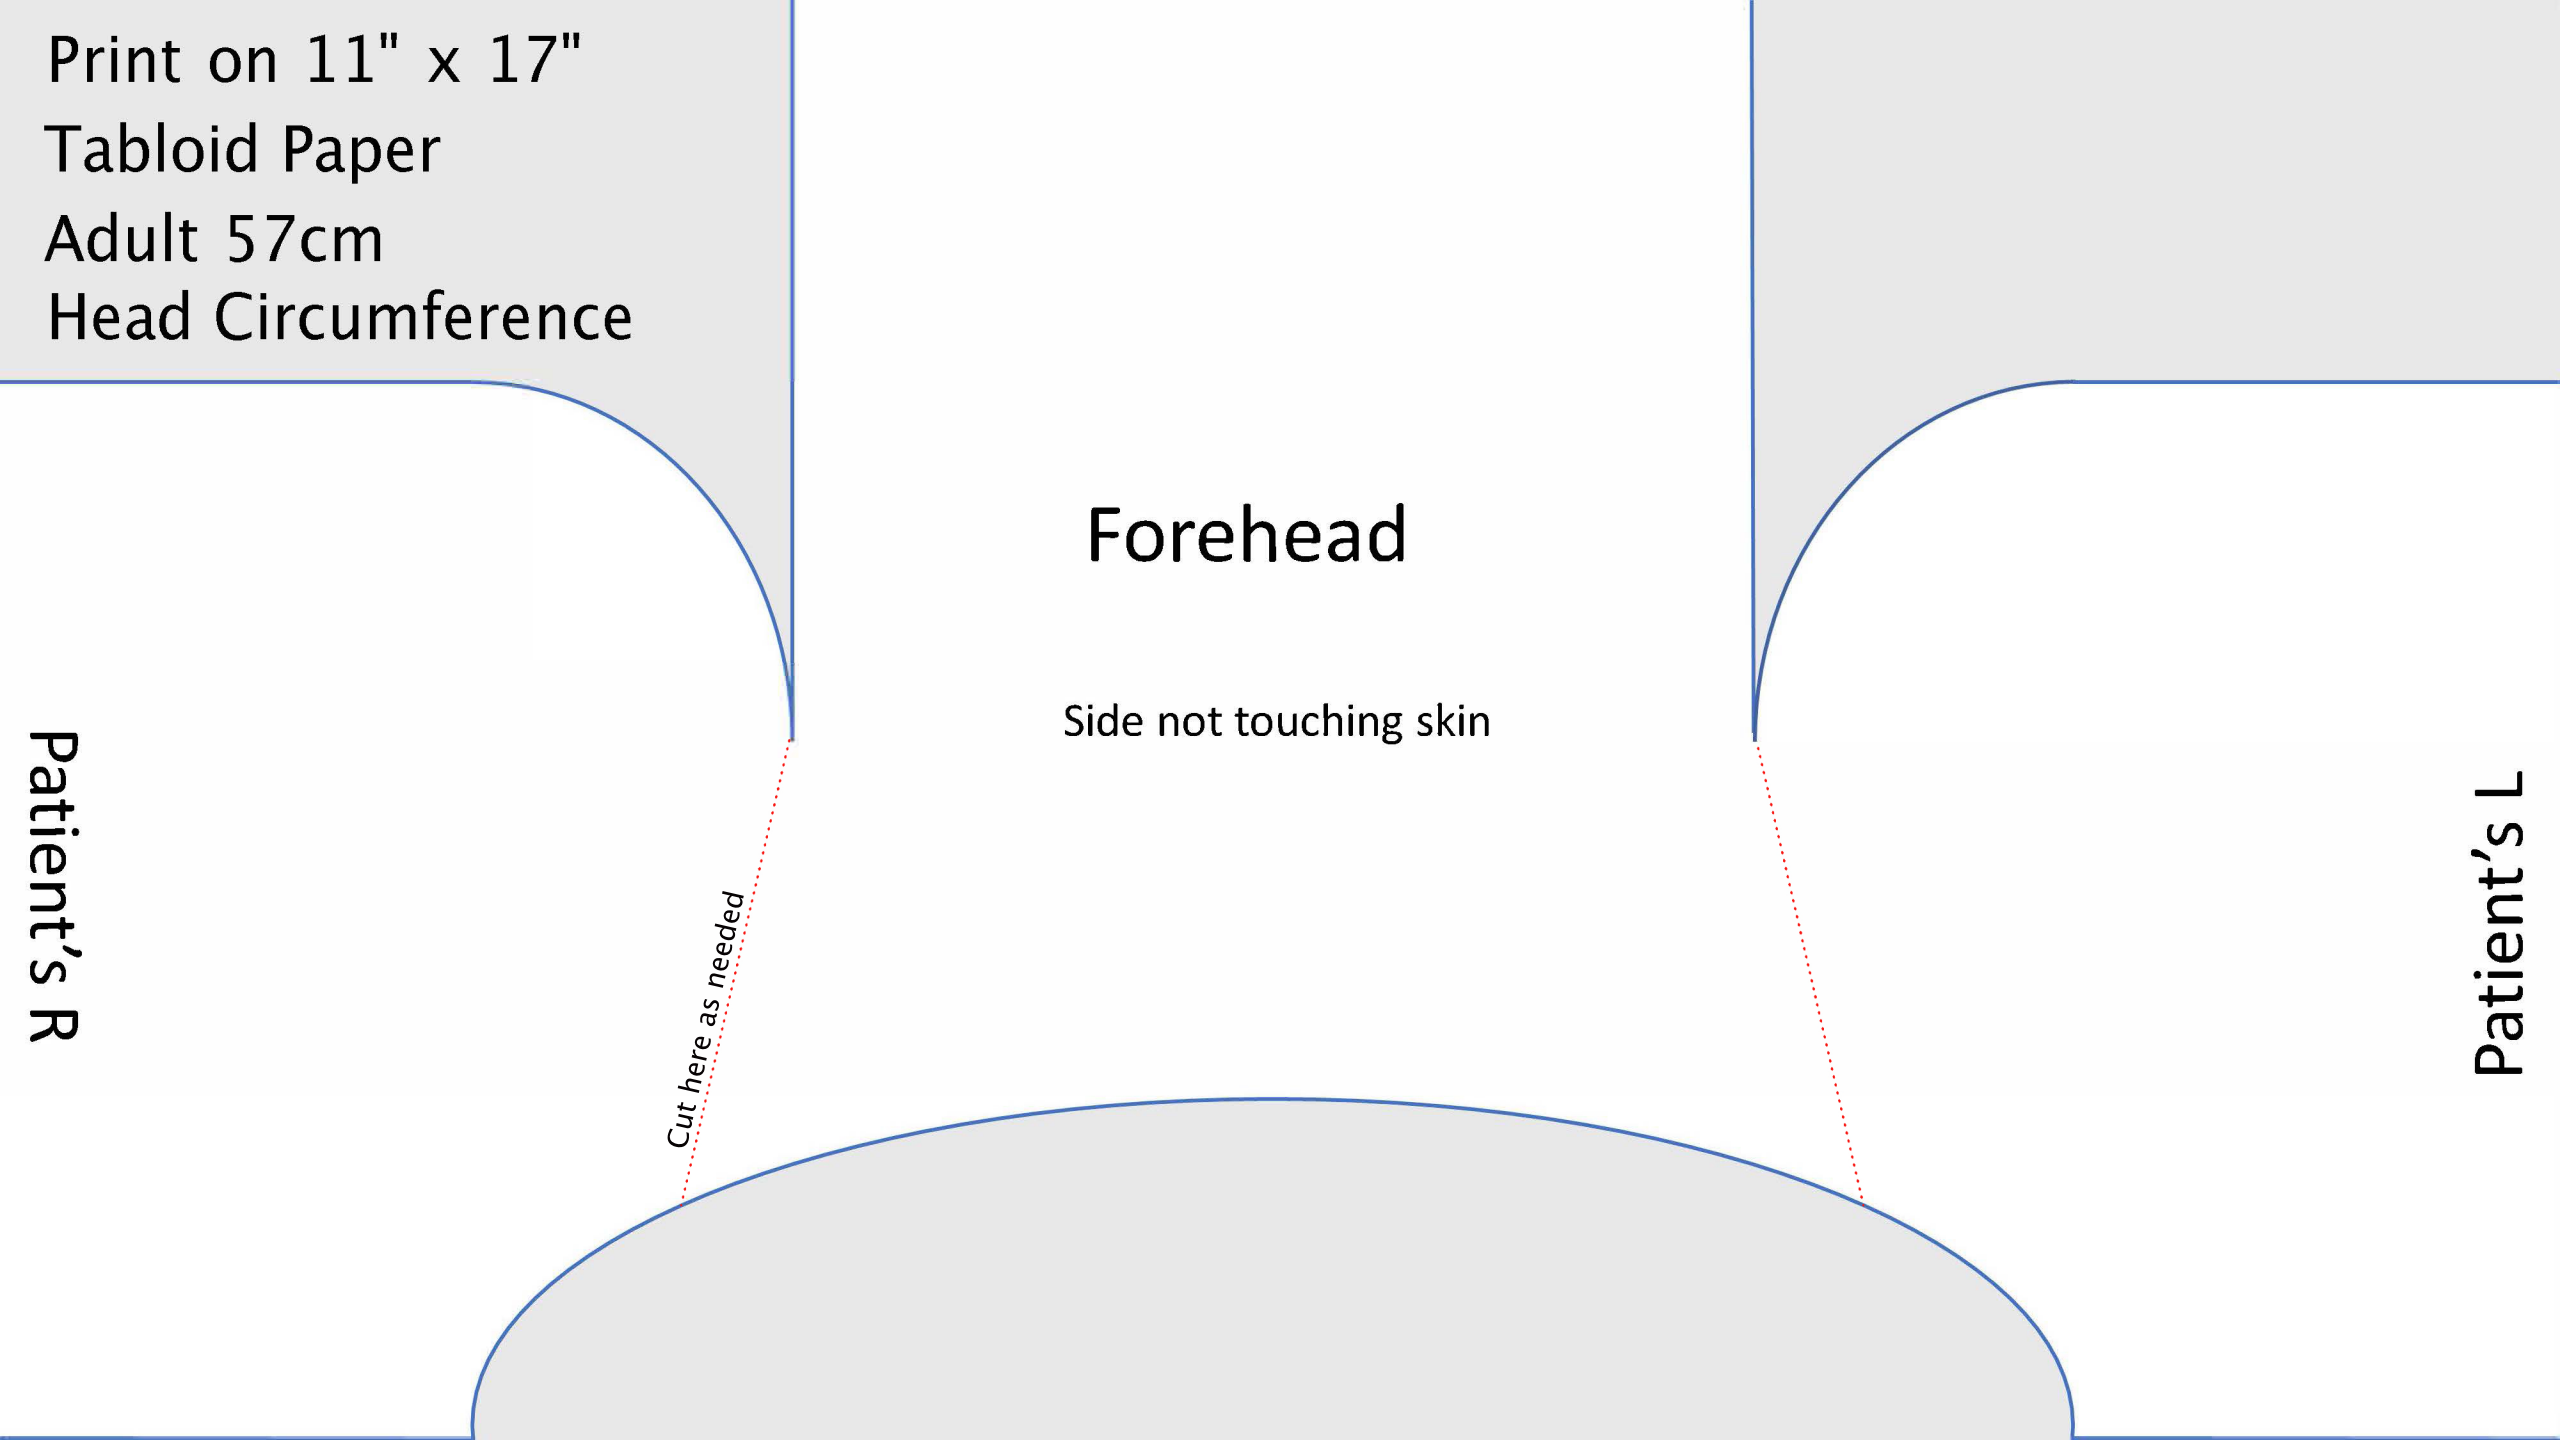

Supplement: mmc6.pdf [file mmc6.pdf]
